# Supplementary material for: Beyond SARS-CoV-2: epidemiological surveillance of respiratory viruses in Jalisco, Mexico
Source: Frontiers journal article supplement (doi:10.3389/fpubh.2023.1292614), 2024-01-11

## Supplementary Material

**Supplementary Table 1.** Disease severity related to age group.

|                 | Age group   |            |             |           |
|-----------------|-------------|------------|-------------|-----------|
|                 | Total       | <18        | 18-60       | >60       |
|                 | n (%)       | n (%)      | n (%)       | n (%)     |
| <b>Symptoms</b> | 3591 (69.3) | 355 (9.9)  | 2895 (80.6) | 341 (9.5) |
| <b>1-3</b>      | 1230 (21)   | 145 (11.8) | 966 (78.5)  | 119 (9.7) |
| <b>4-6</b>      | 1654 (28.3) | 155 (9.4)  | 1336 (80.8) | 163 (9.9) |
| <b>&gt;7</b>    | 707 (12.1)  | 55 (7.8)   | 593 (83.9)  | 59 (8.3)  |

**Supplementary Figure 1.** Phylogenetic analysis of respiratory viruses identified in Mexico reported on public data-base. a) Influenza virus; H1N1 were prevalent. b) Parainfluenza virus; serotype 3 was prevalent. c) Metapneumovirus; only genotype A was found. d) Syncytial virus; serotype A was prevalent. e) Bocavirus; only serotype HBoV1 was reported. f) Rhinovirus; serotype A was prevalent in Mexico. The phylogenetic tree was constructed with the Neighbor-Joining algorithm, employing Tamura-Nei using bootstrap analysis of 10,000 replicates.

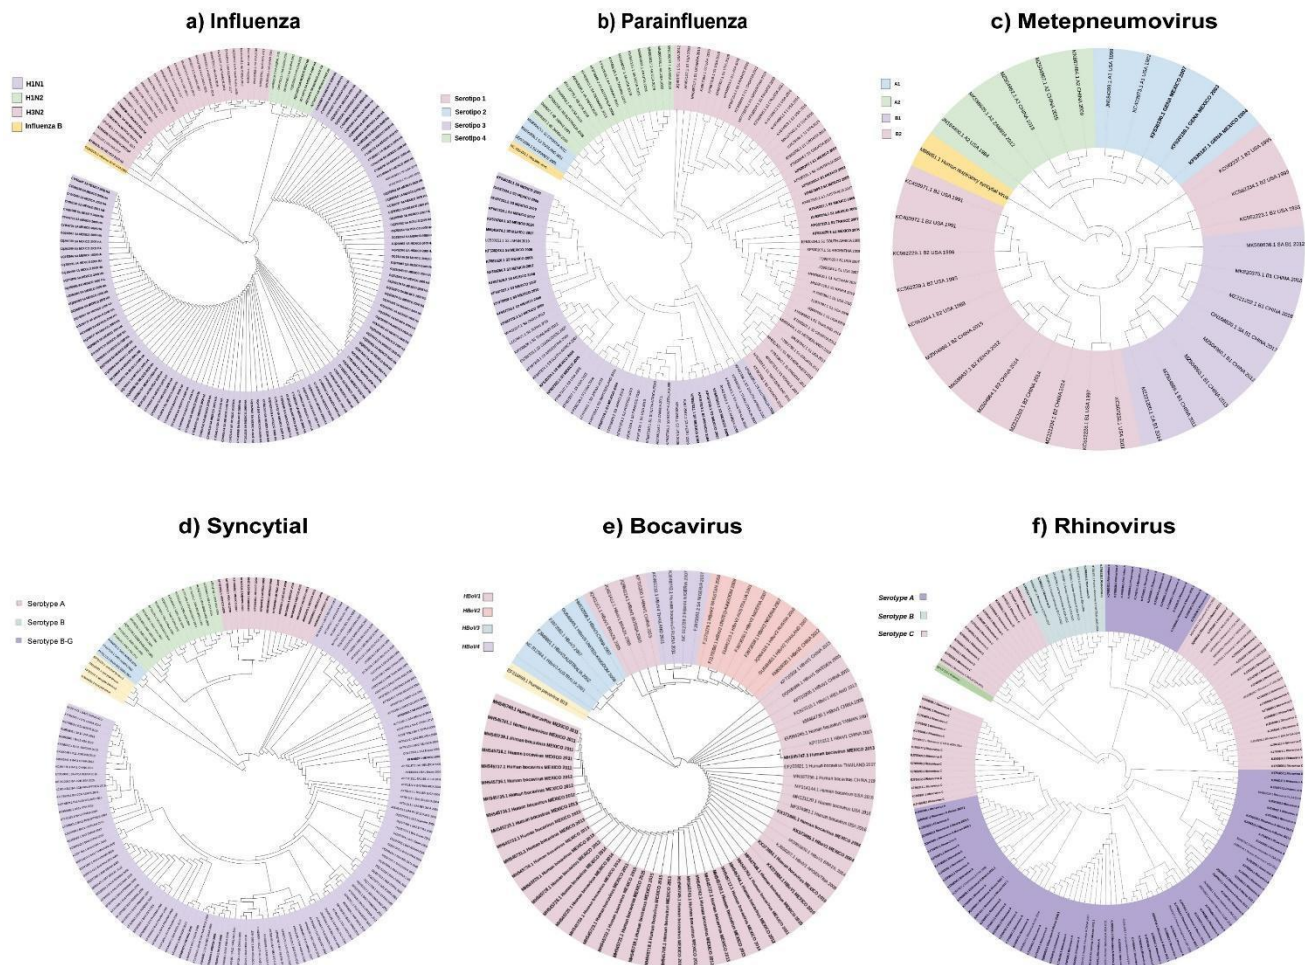

Supplement: Data_Sheet_1.pdf [file Data_Sheet_1.pdf]
